# Supplementary material
Source: PubMed Central journal article supplement (PMC3063093)
Supplement: NIHMS273915-supplement-1_si_001.pdf [file NIHMS273915-supplement-1_si_001.pdf]

## SUPPORTING INFORMATION FOR:

### **Solution Structure of 4'-Phosphopantetheine - GmACP3 from *Geobacter metallireducens*: A Specialized Acyl Carrier Protein with Atypical Structural Features and a Putative Role in Lipopolysaccharide Biosynthesis<sup>†</sup>**

Theresa A. Ramelot<sup>1</sup>, Matthew J. Smola<sup>1</sup>, Hsiau-Wei Lee<sup>2</sup>, Colleen Ciccocanti<sup>3</sup>, Keith Hamilton<sup>3</sup>, Thomas B. Acton<sup>3</sup>, Rong Xiao<sup>3</sup>, John K. Everett<sup>3</sup>, James H. Prestegard<sup>2</sup>, Gaetano T. Montelione<sup>3,4</sup>, and Michael A. Kennedy<sup>1\*</sup>

<sup>1</sup>Department of Chemistry and Biochemistry, Miami University, Oxford, Ohio 45056, United States and the Northeast Structural Genomics Consortium, <sup>2</sup>Complex Carbohydrate Research Center, University of Georgia, Athens, Georgia 30602, United States and the Northeast Structural Genomics Consortium, <sup>3</sup>Center for Advanced Biotechnology and Medicine, Department of Molecular Biology and Biochemistry, Rutgers, The State University of New Jersey, Piscataway, New Jersey 08854, United States and the Northeast Structural Genomics Consortium, and <sup>4</sup>Department of Biochemistry, Robert Wood Johnson Medical School, University of Medicine and Dentistry of New Jersey, Piscataway, New Jersey, 08854, United States

#### **Contents of Supplementary Material**

**Figure S1.** LC-MS Electrospray Mass Spectrum of GmACP3.

**Figure S2** Overlaid <sup>1</sup>H-<sup>15</sup>N HSQC spectra of holo-GmACP3 and a mixture of holo- and apo-GmACP3.

**Figure S3.** <sup>15</sup>N{<sup>1</sup>H} heteronuclear NOE data for holo-GmACP3 recorded at 20°C.

**Figure S4.** The 600 MHz Fast <sup>1</sup>H-<sup>15</sup>N HSQC NMR spectrum of 5%-<sup>13</sup>C, 100%-<sup>15</sup>N *holo*-GmACP3.

**Table S1.** GmACP3 homologs from Blast search of the KEGG database.

**Table. S2.** NOEs between 4'PP and protein resonances in holo-GmACP3.

**Table. S3.** DALI hits against holo-GmACP3 NMR structure.

**Table S4.** RMSDs between holo-GMACP3 and ACPs structural homologs.

**Text S1.** Additional discussion of possible functions of Gmet\_2337 and Gmet\_2340.

**Figure S1.** LC-MS Electrospray Mass Spectrum of GmACP3. Spectrum was collected at the Ohio State University, Mass Spectrometry and Proteomics Facility (<http://www.ccic.ohio-state.edu/MS>). Deconvoluted ESI data is on top and raw data is on the bottom.

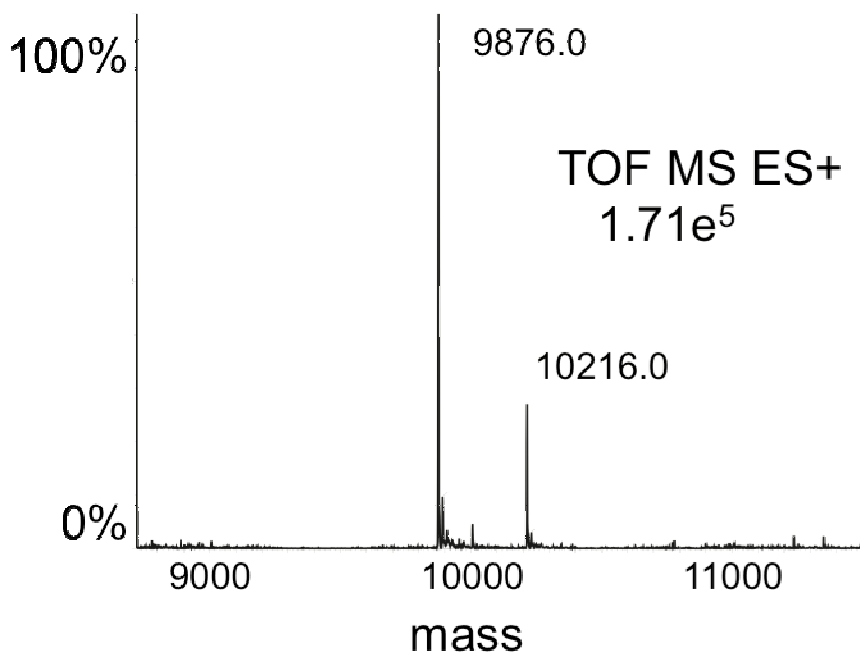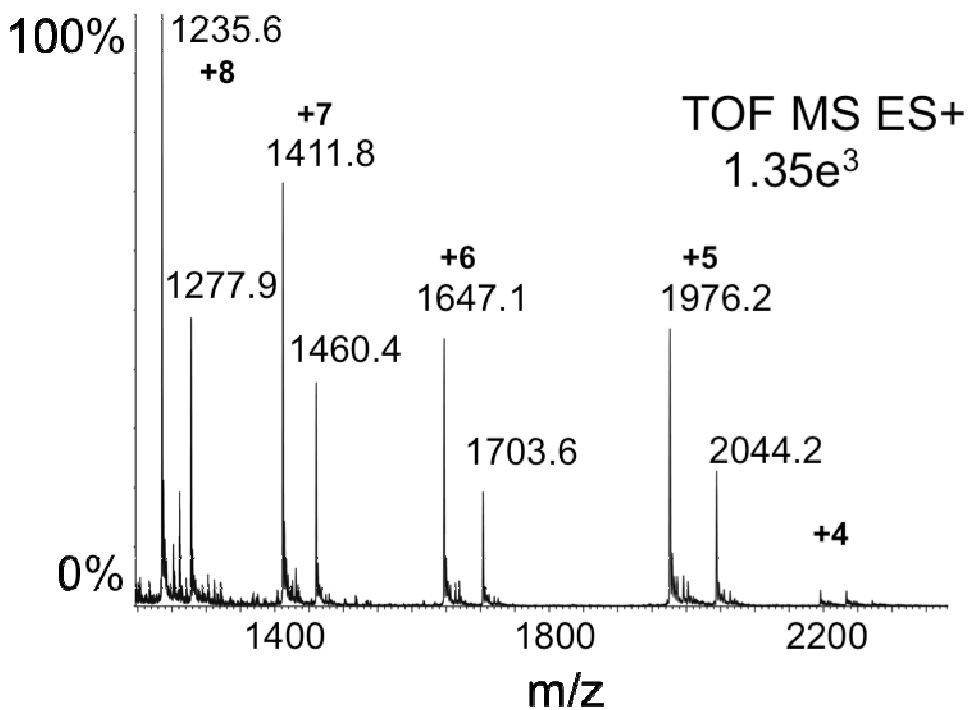

**Figure S2.** Overlaid  $^1\text{H}$ - $^{15}\text{N}$  HSQC spectra of holo-GmACP3 and a mixture of holo- and apo-GmACP3. Red is > 90% holo-GmACP3 NC5 NMR sample. Blue is mixture of apo- and [ $^{13}\text{C}$ ,  $^{15}\text{N}$ ] holo-GmACP3 NMR sample. R12 N-He, R24 N-He, and H39 N-He2 peaks are folded in the  $^{15}\text{N}$  dimension from 86.4, 80.2, and 162.5 ppm, respectively. The W34 N-He is cropped for clarity (12.92 ppm, 133.9 ppm).

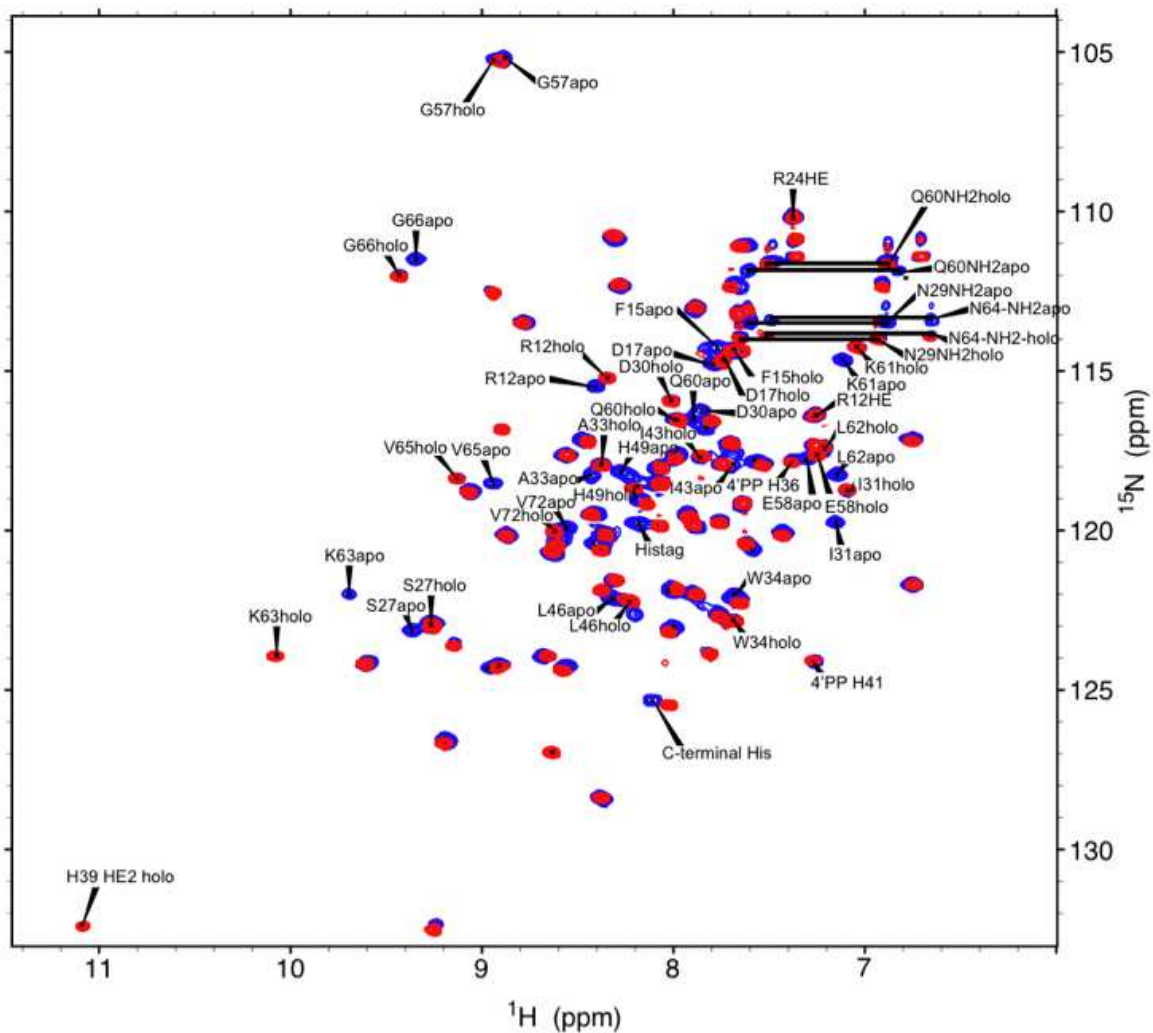

**Figure S3.**  $^{15}\text{N}\{^1\text{H}\}$  heteronuclear NOE data for holo-GmACP3 recorded at 20°C.

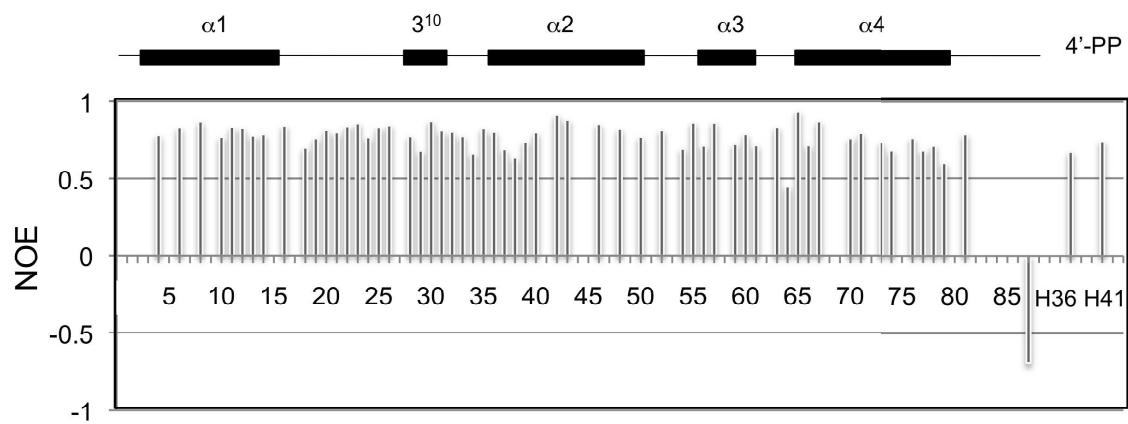

**Figure S4.** Top: The 600 MHz Fast  $^1\text{H}$ - $^{15}\text{N}$  HSQC NMR spectrum of 5%- $^{13}\text{C}$ , 100%- $^{15}\text{N}$  *holo*-GmACP3 in pH 6.5 MES buffer at 20°C. Acquisition parameters:  $^{15}\text{N}$  carrier at 198 ppm,  $J^{\text{NH}} = 22.8$  Hz, 1 s relaxation delay, 1024 x 256 complex points, 200 ppm sweep width in the  $^{15}\text{N}$  dimension, and 256 transients per t1 increment. Assigned cross-peaks for H39 are labeled. The upside down L pattern is indicative of the  $\text{H}^{\text{e}2}$  neutral tautomer (inset). Other peaks are from H49 and the C-terminal His<sub>6</sub> tag. Bottom: close up view of the hydrogen-bonded W34 and H39 in the hydrophobic cavity of GmACP3.

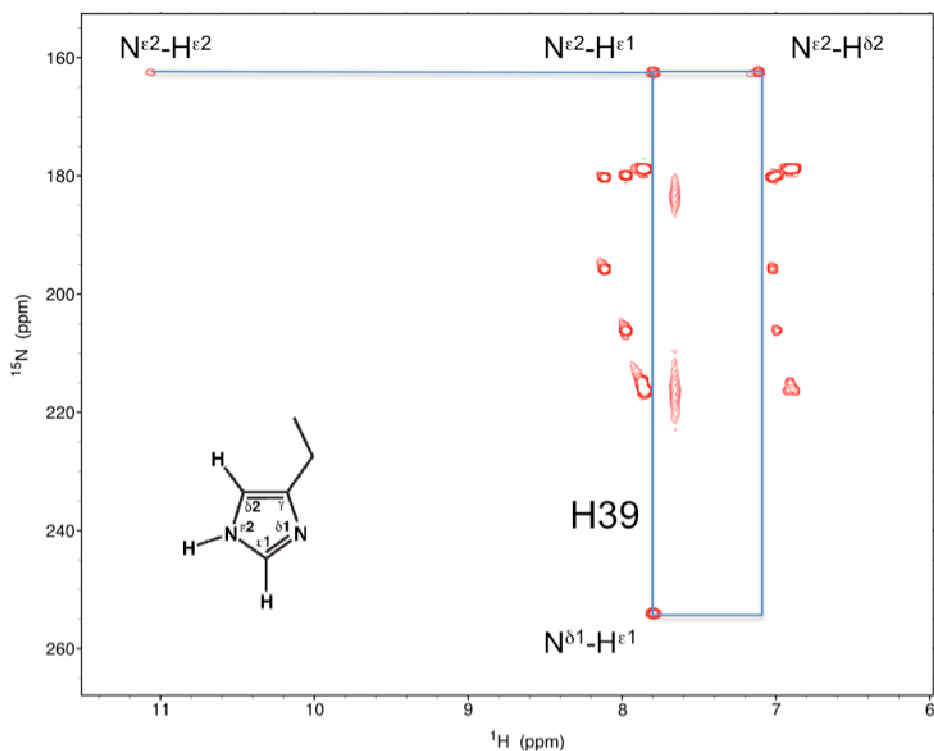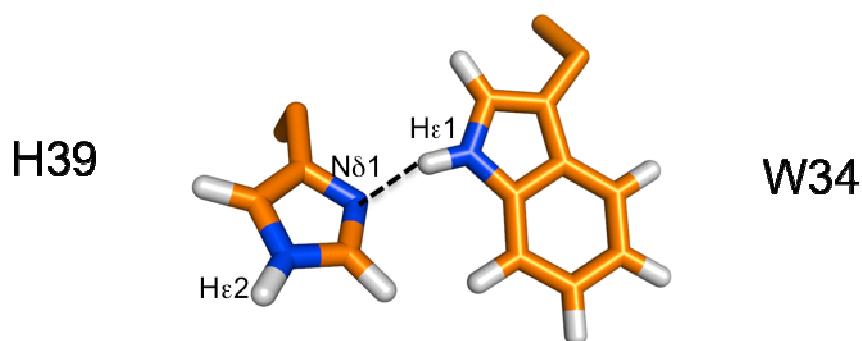

**Table S1.** GmACP3 homologs from Blast search of the KEGG database. The consensus motif is WDS-L/V/F-x-H/N. Everything below *Bacteroides fragilis* BF1532 has less than 40% identity. Genes with KEGG IDs marked with a star have a nearby homolog of *gmet\_2338* that encodes a membrane-bound O-acyl transferase (MBOAT) protein.

| <b>Organism</b>                          | <b>KEGG org</b> | <b>KEGG ID</b>  | <b>sequence</b> |
|------------------------------------------|-----------------|-----------------|-----------------|
| <i>Geobacter metallireducens</i>         | gme             | *gmet_2339      | WDSLxH          |
| <i>Gemmatimonas aurantiaca</i>           | gau             | *GAU_0573       | WDSLxH          |
| <i>Solibacter usitatus</i>               | sus             | *acid_6044      | WDSLxH          |
| <i>Psychromonas ingrahamii</i>           | pin             | *ping_1634      | WDSLxH          |
| <i>Acidobacteria bacterium</i>           | aba             | Acid345_0414    | WDSLxH          |
| <i>Xanthobacter autotrophicus</i>        | xau             | *Xaut_0883      | WDSLxN          |
| <i>Pseudomonas stutzeri</i>              | psa             | *PST_2875       | WDSLxH          |
| <i>Rhodobacter sphaeroides KD131</i>     | rsk             | *RSKD131_2926   | WDSLxH          |
| <i>Rhodobacter sphaeroides 2.4.1</i>     | rsp             | *RSP_1534       | WDSFxH          |
| <i>Rhodobacter sphaeroides</i>           | rsh             | *Rsph17029_0184 | WDSFxH          |
| <i>Bacteroides fragilis YCH46</i>        | bfr             | *BF3277         | WDSLxH          |
| <i>Bacteroides fragilis YCH46</i>        | bfr             | BF1532          | WDSLxH          |
| <i>Sinorhizobium meliloti</i>            | sme             | *SMc01553       | WDSLxN          |
| <i>Sorangium cellulosum</i>              | scl             | 5812467_acpA    | WDSLxN          |
| <i>Frankia alni</i>                      | fal             | FRAAL6258       | WDSLxH          |
| <i>Frankia sp.</i>                       | fra             | Francci3_3942   | WDSLxH          |
| <i>Clostridium acetobutylicum</i>        | cac             | CAC3313         | WDSLxH          |
| <i>Solibacter usitatus</i>               | sus             | acid_7809       | WDSVxH          |
| <i>Clost. beijerinckii</i>               | cbe             | Cbei_2095       | WDSLxH          |
| <i>Nostoc punctiforme</i>                | npu             | Npun_F3159      | WNSMxH          |
| <i>Clostridium thermocellum</i>          | cth             | Cthe_2227       | WDSLxH          |
| <i>Aeromonas hydrophila</i>              | aha             | AHA_3187        | WDSLxH          |
| <i>Campylobacter jejuni</i>              | cjr             | CJE1489         | WTSLxH          |
| <i>Acaryochloris marina</i>              | amr             | AM1_2708        | WDSMxN          |
| <i>Geobacillus sp.</i>                   | gym             | GYMC10_1448     | WDSLxH          |
| <i>Methylbacterium nodulans</i>          | mno             | Mnod_2747       | WDSLxH          |
| <i>Nitrospira multiformis</i>            | nmu             | Nmul_A0283      | WDSLxH          |
| <i>Aeromonas salmonicida</i>             | asa             | ASA_0139        | WDSLxH          |
| <i>Bacteroides fragilis</i>              | bfr             | BF0825          | WDSLxH          |
| <i>Vibrio cholerae</i>                   | vch             | VC0248          | WDSLxH          |
| <i>Herpetosiphon aurantiacus</i>         | hau             | Haur_2031       | WDSLxH          |
| <i>Candidatus Methanoregular booneis</i> | mbn             | Mboo_1741       | WDSLxH          |

**Table S2.** NOEs between 4'PP and protein resonances in holo-GmACP3. Atom names are in Xplor format.

| Residue | proton | 4'PP proton | Upper bound (Å) |
|---------|--------|-------------|-----------------|
| A28     | HN     | H31*        | 5.0             |
| A28     | HB*    | H30*        | 2.5             |
| A28     | HB*    | H31*        | 3.0             |
| A28     | HB*    | H36         | 5.0             |
| A28     | HB*    | H37*        | 4.0             |
| A28     | HB*    | H38*        | 5.0             |
| A28     | HB*    | H41         | 5.0             |
| W34     | HD1    | H31*        | 5.0             |
| D35     | HA     | H31*        | 3.5             |
| S36     | HA     | H28*        | 4.0             |
| S36     | HA     | H30*        | 5.0             |
| S36     | HA     | H31*        | 3.5             |
| S36     | HN     | H31*        | 6.0             |
| S36     | HB*    | H28*        | 5.0             |
| H39     | HB*    | H30*        | 6.0             |
| H39     | HB*    | H31*        | 5.0             |
| H39     | HD2    | H30*        | 5.0             |
| H39     | HE1    | H30*        | 5.0             |
| H39     | HE1    | H31*        | 5.0             |
| K63     | HA     | H38*        | 3.0             |
| K63     | HA     | H41         | 3.0             |
| N64     | HA     | H42*        | 4.0             |
| N64     | HA     | H431        | 3.0             |
| N64     | HA     | H432        | 3.0             |

| 4'PP proton | 4'PP proton | Upper bound (Å) |
|-------------|-------------|-----------------|
| H281        | H30*        | 3.5             |
| H282        | H30*        | 3.5             |
| H28*        | H31*        | 4.0             |
| H30*        | H32         | 4.0             |
| H30*        | H421        | 4.0             |
| H30*        | H422        | 4.0             |
| H30*        | H43*        | 5.0             |
| H31*        | H32         | 3.5             |
| H31*        | H31*        | 5.5             |
| H31*        | H32         | 4.0             |
| H31*        | H371        | 3.0             |
| H31*        | H372        | 3.0             |
| H31*        | H38*        | 3.0             |
| H36         | H30*        | 3.0             |
| H41         | H30*        | 4.0             |
| H41         | H37*        | 5.0             |
| H41         | H38*        | 4.0             |
| H41         | H421        | 3.0             |
| H41         | H422        | 3.0             |
| H41         | H43         | 4.0             |
| H42*        | H43*        | 5.0             |

**Table S3.** DALI hits against holo-GmACP3 NMR structure. Z is the DALI Z-score. RMSD is the C $\alpha$  root mean square deviation to holo-GmACP3 in Å. ALI is the number of aligned residues. LEN is the full length of the structural homolog. %I is the percent sequence identity with GmACP3.

|    | PDB    | Z    | RMSD | ALI | LEN | I%  | Description                                                |
|----|--------|------|------|-----|-----|-----|------------------------------------------------------------|
| 1  | 2kjs-A | 12.4 | 1.4  | 78  | 87  | 100 | >95% holo-GMACP3, self                                     |
| 2  | 2kci-A | 11.6 | 1.8  | 78  | 87  | 100 | 25% holo-GmACP3                                            |
| 3  | 2fvf-A | 9.5  | 1.8  | 76  | 82  | 21  | NMR, spinach decanoyl-ACP                                  |
| 4  | 2cgg-A | 9.3  | 1.7  | 72  | 74  | 25  | 1.8 Å, MtACP (Rv0033 from <i>M. tuberculosis</i> )         |
| 5  | 1vku-A | 9.2  | 1.9  | 75  | 85  | 21  | 2.0 Å, TmACP ( <i>Thermatoga maritima</i> )                |
| 6  | 2kgc-A | 8.8  | 2.1  | 76  | 86  | 22  | NMR, octanoyl-actACP                                       |
| 7  | 2eht-A | 8.8  | 2.0  | 73  | 77  | 22  | 1.4 Å, apo-ACP <i>Aquifex aeolicus</i>                     |
| 8  | 3gzl-A | 8.7  | 2.0  | 74  | 81  | 22  | 2.6 Å, holo-PfACP dimer ( <i>plasmodium falciparum</i> )   |
| 9  | 3ejb-E | 8.7  | 2.0  | 72  | 78  | 19  | 2.0 Å, tetradecanoic- EcACP in P450Biol complex            |
| 10 | 3ejd-A | 8.6  | 1.9  | 71  | 78  | 20  | 2.1 Å, hexadec-9Z-enoic- EcACP in P450Biol complex         |
| 11 | 3ejd-E | 8.6  | 1.9  | 71  | 78  | 20  | 2.1 Å, hexadec-9Z-enoic EcACP- in P450Biol complex         |
| 12 | 3ejb-A | 8.5  | 2.0  | 72  | 78  | 19  | 2.0 Å, tetradecanoic-EcACP in P450Biol complex             |
| 13 | 3eje-C | 8.5  | 1.9  | 71  | 78  | 20  | 2.1 Å, octadec-9Z-enoic-EcACP in P450Biol complex          |
| 14 | 2ehs-A | 8.5  | 1.9  | 72  | 75  | 22  | 1.3 Å, <i>Aquifex aeolicus</i>                             |
| 15 | 3eje-A | 8.4  | 1.9  | 71  | 78  | 20  | 2.1 Å, octadec-9Z-enoic-EcACP in P450Biol complex          |
| 16 | 1f80-E | 8.4  | 1.8  | 70  | 74  | 23  | 2.3 Å, <i>Bacillus subtilis</i> , holo-ACP in AcpS complex |
| 17 | 3gzm-A | 8.3  | 1.9  | 72  | 78  | 22  | 1.8 Å, holoPfACP reduced monomer with malonate             |
| 18 | 2fae-A | 8.3  | 2.2  | 73  | 77  | 21  | 1.6 Å, EcACP-decanoyl                                      |
| 19 | 2fad-A | 8.3  | 2.2  | 73  | 77  | 21  | 1.6 Å, EcACP-heptanoyl                                     |
| 20 | 2fve-A | 8.2  | 2.0  | 76  | 82  | 21  | NMR, spinach decanoyl-ACP                                  |



**Table S4.** RMSDs between holo-GMACP3 and ACPs structural homologs. RMSD is the C $\alpha$  RMSD in Å based on alignment of all four helices. This is residues: 3-15, 35-50, 56-60, and 65-73 of GmACP3. Helix  $\alpha$ 4 is longer (65-79), but only 65-73 line up with the shorter helix  $\alpha$ 4 in *E. coli* ACP.

| <u>PDB</u> | <u>RMSD</u> | <u>Description</u>                                                  |
|------------|-------------|---------------------------------------------------------------------|
| 1tk8       | 1.7         | apo-EcACP                                                           |
| 1loh-A     | 1.8         | “apo”-EcACP from butyryl-ACP crystal                                |
| 1loi-A     | 1.7         | butyryl-EcACP I62M mutant                                           |
| 2fac-A     | 1.6         | hexanoyl-EcACP                                                      |
| 2fad-A     | 1.6         | heptanoyl-EcACP                                                     |
| 2fad-B     | 1.6         | heptanoyl-EcACP                                                     |
| 2fae-A     | 1.6         | decanoyl-EcACP                                                      |
| 3ejb       | 1.4         | tetradecanoyl-EcACP in P450 <sub>Biol</sub> complex                 |
| 3ejd       | 1.4         | hexadec-9Z-anoyl EcACP- in P450 <sub>Biol</sub> complex             |
| 3eje       | 1.4         | octadec-9Z-anoyl-EcACP in P450 <sub>Biol</sub> complex              |
| 2k92-1     | 2.6         | apo-EcACP (NMR)                                                     |
| 2k93-1     | 2.3         | holo-EcACP (NMR)                                                    |
| 2k94-1     | 2.3         | butyryl-EcACP (NMR)                                                 |
| 2k0y-1     | 2.2         | apo-actACP (NMR)                                                    |
| 2k0x-1     | 2.2         | holo-actACP (NMR)                                                   |
| 2kgd-1     | 2.7         | oxybutyl-actACP (NMR)                                               |
| 2kge-1     | 2.6         | dioxohexyl-actACP (NMR)                                             |
| 2kg6-1     | 2.5         | acetyl-actACP (NMR)                                                 |
| 2kg8-1     | 2.4         | malonyl-actACP (NMR)                                                |
| 2kg9-1     | 2.1         | butyryl-actACP (NMR)                                                |
| 2kgA-1     | 1.5         | hexanoyl-actACP (NMR)                                               |
| 2kgC-1     | 1.5         | octanoyl-actACP (NMR)                                               |
| 2cgq-A     | 1.5         | MtACP (Rv0033 from <i>M. tuberculosis</i> ) “FDSLKL”                |
| 1vku-A     | 1.8         | TmACP TmACP ( <i>Thermatoga maritima</i> ) – has longer h4 “ADSLDL” |
| 3gzl       | 1.4         | holo-PfACP dimer ( <i>plasmodium falciparum</i> ) “ADSLDL”          |
| 2eht       | 1.4         | apo-ACP <i>Aquifex aeolicus</i> “ADSLDV”                            |

**Text S1.** Additional discussion of possible functions of Gmet\_2337 and Gmet\_2340.

Gmet\_2337 is annotated as a hypothetical protein and has 31% sequence identity to *E. coli* YiiM, annotated as a 6-N-hydroxylaminopurine resistance protein, and has 26% sequence identity to the C-terminal 100 residues of AlgJ. Gmet\_2337 contains conserved GDSFS and DDTHW sequences that are similar to those found in GDSL serine esterases/lipases and SGNH-hydrolase proteins as well as a potential S-D-H triad (1, 2). GDSL enzymes possess many functions, including hydrolysis and synthesis of lipids and esters. This family includes a subfamily of carbohydrate esterases that includes rhamnogalacturonan acetyltransferase from *Aspergillus aculeatus*, which removes acetyl groups from the polysaccharide rhamnogalacturonan (3). The role of Gmet\_2337 could be to hydrolyze incorrect thioesters from GmACP3, with a parallel function to the *Lactobacillus rhamnosus* thioesterase, DltD, that hydrolyzes mischarged D-alanyl-ACP, so that the correct D-alanyl-ACP will be synthesized (4).

The neighboring gene *gmet\_2340* that has recently been annotated as an acetyl-CoA synthetase based on its 42% sequence identity with the *B. subtilis* enzyme (AcsA, BSU29680) (5). The action of this enzyme may allow *G. metallireducens* to metabolize acetate found in soil. It is possible that acetyl-CoA derived from enzymatic conversion could be a substrate for acylation of GmACP3. The resulting acetyl-ACP could then be an extender unit for further synthesis.

1. Upton, C., and Buckley, J. T. (1995) A new family of lipolytic enzymes? *Trends Biochem. Sci.* 20, 178-179.
2. Akoh, C. C., Lee, G. C., Liaw, Y. C., Huang, T. H., and Shaw, J. F. (2004) GDSL family of serine esterases/lipases. *Prog. Lipid Res.* 43, 534-552.
3. Molgaard, A., Kauppinen, S., and Larsen, S. (2000) Rhamnogalacturonan acetyltransferase elucidates the structure and function of a new family of hydrolases. *Structure* 8, 373-383.
4. Kiriukhin, M. Y., and Neuhaus, F. C. (2001) D-alanylation of lipoteichoic acid: role of the D-alanyl carrier protein in acylation. *J. Bacteriol.* 183, 2051-2058.
5. Aklujkar, M., Krushkal, J., DiBartolo, G., Lapidus, A., Land, M. L., and Lovley, D. R. (2009) The genome sequence of *Geobacter metallireducens*: features of metabolism, physiology and regulation common and dissimilar to *Geobacter sulfurreducens*. *BMC Microbiol.* 9, 109.
